# Supplementary material for: Identification of Resistance Determinants for a Promising Antileishmanial Oxaborole Series
Source: MDPI journal article supplement (doi:10.3390/microorganisms9071408), 2021-06-29
Supplement: s1 [file s1]

## SUPPLEMENTARY DATA

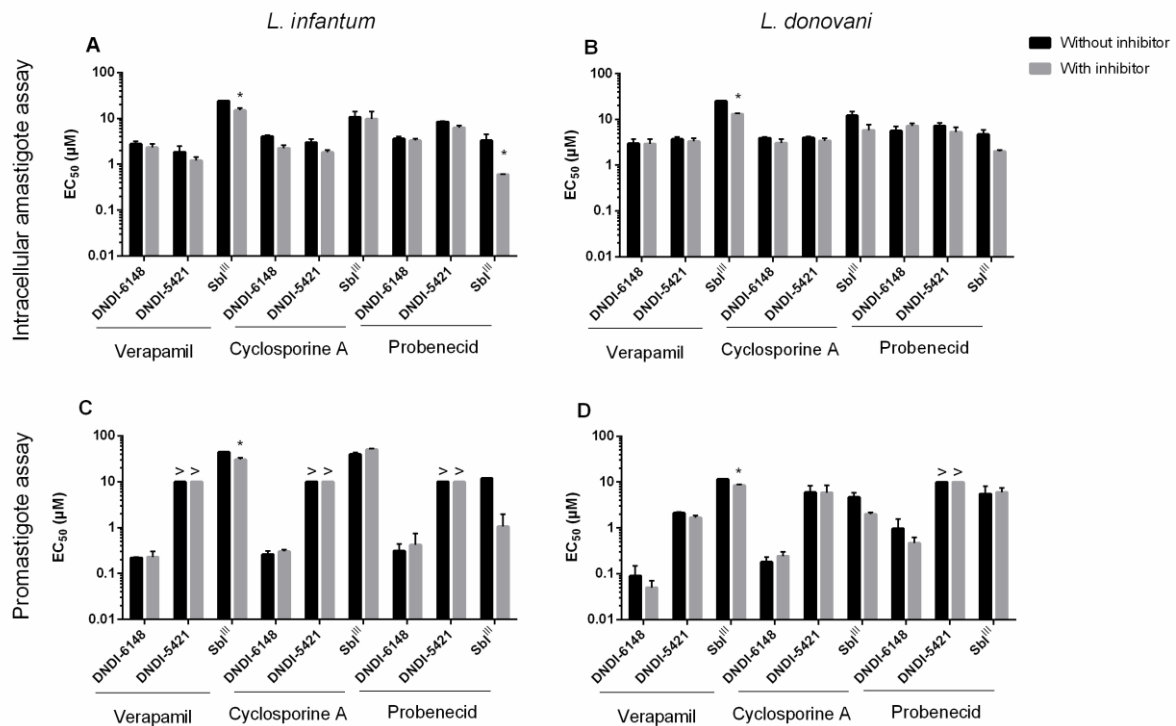

**Figure S1:** Effect of co-incubation of verapamil, cyclosporine A and probenecid with the oxaboroles for *L. infantum* (A&C) and *L. donovani* (B&D) in the intracellular amastigote (A&B) and promastigote (C&D) susceptibility assay. Results are based on two independent repeats run in duplicate and are expressed as the mean of the  $EC_{50} \pm SEM$  (\* $p < 0.05$ ) (>:  $EC_{50}$  was higher than highest in-test concentration).

**Table S1:** Overview of the gene functions of the other highest enriched cosmids from the *L. infantum* Cos-Seq screen.

|               | Gene ID        | Gene name                                                      | Max enrichment |
|---------------|----------------|----------------------------------------------------------------|----------------|
| Chromosome 35 | LINF_350058100 | Alpha-1-2-mannosyltransferase - putative                       | 2071           |
|               | LINF_350058200 | Homeobox associated leucine zipper - putative                  | 2178           |
|               | LINF_350058300 | WD domain - G-beta repeat - putative                           | 2613           |
|               | LINF_350058400 | Hypothetical protein - conserved                               | 1738           |
|               | LINF_350058500 | Lsm12 protein - putative                                       | 1123           |
|               | LINF_350058600 | Hypothetical protein - conserved                               | 921            |
|               | LINF_350058700 | Ribosome-interacting GTPase 2 - putative                       | 1009           |
|               | LINF_350058800 | SAC3/GANP/Nin1/mts3/eIF-3 p25 family - putative                | 910            |
|               | LINF_350058900 | Isopentenyl-diphosphatase delta-isomerase (type II) - putative | 505            |

|               |                |                                                                                       |     |
|---------------|----------------|---------------------------------------------------------------------------------------|-----|
|               | LINF_350059000 | Dynein heavy chain and region D6 of dynein motor/Anykrin repeats (3copies) - putative | 824 |
|               | LINF_350059100 | Amino acid permease - putative                                                        | 724 |
| Chromosome 34 | LINF_340041100 | Metallo-beta-lactamase superfamily - putative                                         | 231 |
|               | LINF_340041200 | Cleavage and polyadenylation specificity factor - putative                            | 770 |
|               | LINF_340041300 | DNA topoisomerase IB - large subunit                                                  | 616 |
|               | LINF_340041400 | Hypothetical protein - conserved                                                      | 662 |
|               | LINF_340041500 | Hypothetical protein - conserved                                                      | 480 |
|               | LINF_340041600 | Amidinotransferase putative                                                           | 502 |
|               | LINF_340041700 | Hypothetical protein - conserved                                                      | 648 |
|               | LINF_340041800 | TPR repeat/Tetratricopeptide repeat - putative                                        | 532 |
|               | LINF_340041900 | Ruvb-like 1 DNA helicase - putative                                                   | 485 |
|               | LINF_340042000 | Hypothetical protein - conserved                                                      | 587 |
|               | LINF_340042100 | Peroxisome biosynthesis protein-like protein                                          | 631 |
|               | LINF_340042700 | Hypothetical protein - conserved                                                      | 301 |
| Chromosome 17 | LINF_170020700 | Cytidyltransferase - putative                                                         | 183 |
|               | LINF_170020800 | Cytochrome b5-like Heme/Steroid binding domain containing protein – putative          | 160 |
|               | LINF_170020900 | L-galactonolactone oxidase - putative                                                 | 199 |
|               | LINF_170021000 | NUC130/3NT domain/SDA1 - putative                                                     | 121 |
|               | LINF_170021100 | Hypothetical protein - conserved                                                      | 129 |
|               | LINF_170021200 | IQ calmodulin-binding motif containing protein - putative                             | 159 |
|               | LINF_170021300 | Myo-inositol-1(or 4)-monophosphatase 1 - putative                                     | 137 |
|               | LINF_170021400 | Otubain cysteine peptidase - Clan CA - family C65 - putative                          | 132 |
|               | LINF_170021500 | Zinc-finger protein ZPR1 - putative                                                   | 235 |
|               | LINF_170021600 | Hypothetical protein - conserved                                                      | 192 |
|               | LINF_170021800 | Major Facilitator Superfamily - putative                                              | 209 |

**Table S2: Genes encoded by the top 5 enriched regions of cosmids in DNDi-6148-resistant parasites following selection of the counter-screen cosmid library.** Genes highlighted in green are rationalized to be the specific resistance determinants based on identification/location of barcodes. The two genomic fragments that were enriched also in the *L. infantum* Cos-Seq screening are highlighted on top.

|               | Gene ID             | Gene name                                                                                                                                 | RPKM  |
|---------------|---------------------|-------------------------------------------------------------------------------------------------------------------------------------------|-------|
| Chromosome 2  | LdLV9.02.2.201140.1 | ABC-2 family transporter protein/ABC transporter, putative                                                                                | 26.6  |
|               | LdBPK.02.2.000280.1 | Soluble NSF attachment protein, SNAP, putative                                                                                            | 126.5 |
|               | LdBPK.02.2.000290.1 | 3' exoribonuclease family, domain 1, putative                                                                                             | 127.8 |
|               | LdBPK.02.2.000300.1 | Glycosyltransferase family 10 (fucosyltransferase) C-term, putative                                                                       | 346.8 |
|               | LdBPK.02.2.000310.1 | UAA transporter family, putative                                                                                                          | 460.2 |
|               | LdBPK.02.2.000320.1 | hypothetical protein, conserved                                                                                                           | 490.9 |
|               | LdBPK.02.2.000330.1 | Protein kinase domain/Protein tyrosine kinase, putative                                                                                   | 449.1 |
|               | LdBPK.02.2.000340.1 | PCI domain containing protein, putative                                                                                                   | 450.9 |
|               | LdBPK.02.2.000350.1 | FtsJ-like methyltransferase, putative                                                                                                     | 539.9 |
|               | LdBPK.02.2.000360.1 | Ubiquitin-conjugating enzyme, putative                                                                                                    | 593.3 |
|               | LdBPK.02.2.000380.1 | hypothetical protein, conserved                                                                                                           | 436.0 |
|               | LdBPK.02.2.000390.1 | hypothetical protein, conserved                                                                                                           | 407.3 |
|               | LdBPK.02.2.000400.1 | hypothetical protein, conserved                                                                                                           | 178.9 |
|               | LdLV9.02.2.201150.1 | Transmembrane amino acid transporter protein, putative                                                                                    | 26.0  |
| Chromosome 35 | LdBPK.35.2.005180.1 | 50S ribosome-binding GTPase, putative                                                                                                     | 3.2   |
|               | LdBPK.35.2.005190.1 | hypothetical protein, conserved                                                                                                           | 4.3   |
|               | LdBPK.35.2.005200.1 | Putative methyltransferase, putative                                                                                                      | 4.4   |
|               | LdBPK.35.2.005210.1 | hypothetical protein, conserved                                                                                                           | 32.9  |
|               | LdBPK.35.2.005220.1 | ALG11 mannosyltransferase N-terminus/Glycosyl transferases group 1, putative                                                              | 73.7  |
|               | LdBPK.35.2.005230.1 | hypothetical protein, conserved                                                                                                           | 165.4 |
|               | LdBPK.35.2.005240.1 | WD domain, G-beta repeat, putative                                                                                                        | 395.1 |
|               | LdBPK.35.2.005250.1 | hypothetical protein, conserved                                                                                                           | 388.7 |
|               | LdBPK.35.2.005260.1 | hypothetical protein, conserved                                                                                                           | 458.1 |
|               | LdBPK.35.2.005270.1 | hypothetical protein, conserved                                                                                                           | 482.9 |
|               | LdBPK.35.2.005280.1 | Ferrous iron transport protein B/50S ribosome-binding GTPase/C-terminal region of MMR_HSR1 domain/TGS domain containing protein, putative | 460.5 |
|               | LdBPK.35.2.005290.1 | SAC3/GANP/Nin1/mts3/eIF-3 p25 family, putative                                                                                            | 408.8 |
|               | LdBPK.35.2.005300.1 | FMN-dependent dehydrogenase, putative                                                                                                     | 436.0 |
|               | LdBPK.35.2.005310.1 | Dynein heavy chain and region D6 of dynein motor/Ankyrin repeat, putative                                                                 | 407.0 |
|               | LdBPK.35.2.005320.1 | Transmembrane amino acid transporter protein, putative                                                                                    | 424.2 |
|               | LdBPK.35.2.005070.1 | Tryptophan/tyrosine permease family/Transmembrane amino acid transporter protein, putative                                                | 434.7 |
|               | LdBPK.35.2.005060.1 | Diacylglycerol kinase catalytic domain/Diacylglycerol kinase accessory domain containing protein, putative                                | 462.1 |
|               | LdBPK.35.2.005050.1 | hypothetical protein, conserved                                                                                                           | 452.3 |
| Chromosome 21 | LdBPK.35.2.005080.1 | SPRY domain/HECT-domain (ubiquitin-transferase), putative                                                                                 | 176.7 |
|               | LdBPK.21.2.001850.1 | hypothetical protein, conserved                                                                                                           | 20.7  |
|               | LdBPK.21.2.001860.1 | GMC oxidoreductase, putative                                                                                                              | 28.7  |
|               | LdBPK.21.2.001870.1 | Protein kinase domain/Protein tyrosine kinase/Kinase-like, putative                                                                       | 48.1  |
|               | LdBPK.21.2.001880.1 | Microtubule-binding protein MIP-T3, putative                                                                                              | 109.1 |
|               | LdBPK.21.2.001890.1 | hypothetical protein, conserved                                                                                                           | 173.6 |
|               | LdBPK.21.2.001900.1 | Peroxidase, putative                                                                                                                      | 171.3 |
|               | LdBPK.21.2.001910.1 | hypothetical protein, conserved                                                                                                           | 163.6 |
|               | LdLV9.21.2.205030.1 | hypothetical protein, conserved                                                                                                           | 192.9 |

|               |                     |                                                                                                      |       |
|---------------|---------------------|------------------------------------------------------------------------------------------------------|-------|
|               | LdBPK.11.2.000660.1 | hypothetical protein, conserved                                                                      | 383.8 |
|               | LdBPK.21.2.001940.1 | F-box domain/F-box-like, putative                                                                    | 433.2 |
|               | LdBPK.21.2.001950.1 | hypothetical protein, conserved                                                                      | 604.2 |
|               | LdBPK.21.2.001960.1 | hypothetical protein, conserved                                                                      | 667.0 |
|               | LdBPK.21.2.001970.1 | Ubiquitin-2 like Rad60 SUMO-like, putative                                                           | 605.0 |
|               | LdBPK.21.2.001980.1 | PPR repeat family, putative                                                                          | 532.2 |
|               | LdBPK.21.2.001990.1 | EF hand/EF-hand domain pair, putative                                                                | 476.0 |
|               | LdBPK.21.2.002000.1 | hypothetical protein, conserved                                                                      | 448.0 |
|               | LdBPK.21.2.002010.1 | Protein kinase domain/Protein tyrosine kinase, putative                                              | 381.4 |
|               | LdBPK.21.2.002020.1 | 5'-3' exonuclease, N-terminal resolvase-like domain/5'-3' exonuclease, C-terminal SAM fold, putative | 421.2 |
|               | LdBPK.21.2.002030.1 | hypothetical protein, conserved                                                                      | 398.5 |
|               | LdBPK.21.2.002040.1 | hypothetical protein, conserved                                                                      | 399.1 |
|               | LdBPK.21.2.002050.1 | Pumilio-family RNA binding repeat, putative                                                          | 319.5 |
|               | LdBPK.21.2.002060.1 | Mitochondrial calcium uniporter, putative                                                            | 290.6 |
|               | LdBPK.21.2.002070.1 | Proteasome subunit A N-terminal signature/Proteasome subunit, putative                               | 238.8 |
|               | LdBPK.21.2.002080.1 | hypothetical protein, conserved                                                                      | 105.8 |
|               | LdBPK.21.2.002090.1 | Ribosomal protein L32, putative                                                                      | 56.8  |
| Chromosome 26 | LdBPK.26.2.002510.1 | hypothetical protein, conserved                                                                      | 26.1  |
|               | LdBPK.26.2.002520.1 | hypothetical protein, conserved                                                                      | 36.3  |
|               | LdBPK.26.2.002530.1 | hypothetical protein, conserved                                                                      | 37.3  |
|               | LdBPK.26.2.002540.1 | FYVE zinc finger/Protein tyrosine kinase/Protein kinase domain containing protein, putative          | 46.6  |
|               | LdBPK.26.2.002550.1 | hypothetical protein, conserved                                                                      | 171.7 |
|               | LdLV9.26.2.206240.1 | Calcineurin-like phosphoesterase, putative                                                           | 202.7 |
|               | LdBPK.26.2.002570.1 | hypothetical protein, conserved                                                                      | 387.8 |
|               | LdBPK.26.2.002580.1 | hypothetical protein, conserved                                                                      | 585.8 |
|               | LdBPK.26.2.002590.1 | ATP-grasp domain/D-ala D-ala ligase C-terminus/SET domain containing protein, putative               | 570.9 |
|               | LdBPK.26.2.002600.1 | Protein tyrosine kinase/Protein kinase domain containing protein, putative                           | 692.3 |
|               | LdBPK.26.2.002620.1 | Paraquat-inducible protein A, putative                                                               | 713.5 |
|               | LdBPK.26.2.002630.1 | hypothetical protein, conserved                                                                      | 842.2 |
|               | LdBPK.26.2.002640.1 | FAD binding domain/NAD(P)-binding Rossmann-like domain containing protein, putative                  | 698.2 |
|               | LdBPK.26.2.002650.1 | hypothetical protein, conserved                                                                      | 652.6 |
|               | LdBPK.26.2.002660.1 | CSL zinc finger containing protein, putative                                                         | 657.0 |
|               | LdBPK.26.2.002670.1 | hypothetical protein, conserved                                                                      | 549.1 |
|               | LdBPK.26.2.002680.1 | HECT-domain (ubiquitin-transferase), putative                                                        | 425.4 |
|               | LdBPK.26.2.002690.1 | hypothetical protein, conserved                                                                      | 201.0 |
|               | LdBPK.26.2.002700.1 | ABC transporter transmembrane region/ABC transporter, putative                                       | 95.8  |
|               | LdBPK.26.2.002710.1 | hypothetical protein, conserved                                                                      | 27.2  |
|               | LdBPK.26.2.002720.1 | CAAX protease self-immunity, putative                                                                | 0.8   |
| Chromosome 26 | LdBPK.26.2.000700.1 | hypothetical protein, conserved                                                                      | 108.3 |
|               | LdBPK.26.2.000710.1 | Regulator of chromosome condensation (RCC1) repeat, putative                                         | 229.7 |
|               | LdBPK.26.2.000720.1 | Regulator of chromosome condensation (RCC1) repeat, putative                                         | 437.9 |

|                     |                                                                                                                          |       |
|---------------------|--------------------------------------------------------------------------------------------------------------------------|-------|
| LdBPK.26.2.000730.1 | RNA recognition motif. (a.k.a. RRM, RBD, or RNP domain)/RNA recognition motif (a.k.a. RRM, RBD, or RNP domain), putative | 589.7 |
| LdBPK.26.2.000740.1 | hypothetical protein, conserved                                                                                          | 560.7 |
| LdBPK.26.2.000750.1 | RNA recognition motif. (a.k.a. RRM, RBD, or RNP domain), putative                                                        | 703.5 |
| LdBPK.26.2.000760.1 | hypothetical protein, conserved                                                                                          | 826.5 |
| LdLV9.26.2.206120.1 | Glutathione peroxidase, putative                                                                                         | 579.8 |
| LdLV9.26.2.206130.1 | Glutathione peroxidase, putative                                                                                         | 817.8 |
| LdBPK.26.2.000790.1 | Aspartate-ammonia ligase, putative                                                                                       | 978.2 |
| LdBPK.26.2.000800.1 | hypothetical protein, conserved                                                                                          | 637.2 |
| LdBPK.26.2.000810.1 | hypothetical protein, conserved                                                                                          | 655.4 |
| LdBPK.26.2.000820.1 | Endonuclease/Exonuclease/phosphatase family, putative                                                                    | 611.7 |
| LdBPK.26.2.000830.1 | hypothetical protein, conserved                                                                                          | 505.4 |
| LdLV9.26.2.206140.1 | Ribosomal protein S9/S16, putative                                                                                       | 392.6 |
| LdLV9.26.2.206150.1 | Ribosomal protein S9/S16, putative                                                                                       | 316.1 |
| LdBPK.26.2.000860.1 | Hsp70 protein, putative                                                                                                  | 152.6 |
| LdBPK.26.2.000880.1 | hypothetical protein, conserved                                                                                          | 68.0  |
| LdBPK.26.2.000890.1 | hypothetical protein, conserved                                                                                          | 94.7  |
| LdBPK.26.2.000900.1 | hypothetical protein, conserved                                                                                          | 68.0  |
| LdBPK.26.2.000910.1 | DnaJ domain/Domain of unknown function (DUF3395), putative                                                               | 19.4  |
